## RESEARCH ARTICLE

# Cytotoxic effects of *Lavandula angustifolia* seed extracts on the viability of Huh-7 and Chang liver cells

Ghedeir M. Alshammari <sup>\*</sup>

Department of Food Science and Nutrition, College of Food and Agricultural Science, King Saud University, Riyadh, Saudi Arabia

<sup>\*</sup> [agheir@ksu.edu.sa](mailto:agheir@ksu.edu.sa)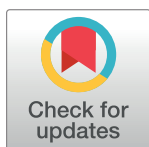

## OPEN ACCESS

**Citation:** Alshammari GM (2022) Cytotoxic effects of *Lavandula angustifolia* seed extracts on the viability of Huh-7 and Chang liver cells. PLoS ONE 17(4): e0267499. <https://doi.org/10.1371/journal.pone.0267499>

**Editor:** Rahul Datta, Mendel University of Agriculture and Forestry: Mendelova univerzita v Brne, CZECH REPUBLIC

**Received:** January 19, 2022

**Accepted:** April 8, 2022

**Published:** April 21, 2022

**Copyright:** © 2022 Ghedeir M. Alshammari. This is an open access article distributed under the terms of the [Creative Commons Attribution License](https://creativecommons.org/licenses/by/4.0/), which permits unrestricted use, distribution, and reproduction in any medium, provided the original author and source are credited.

**Data Availability Statement:** All relevant data are within the paper.

**Funding:** The authors would like to extend his sincere appreciation to the 'Researchers Supporting Project' number (RSP-2021/84), King Saud University, Riyadh, Saudi Arabia. The funders had no role in study design, data collection and analysis, decision to publish, or preparation of the manuscript.

**Competing interests:** The authors have declared that no competing interests exist.

## Abstract

Flowering plants are valuable in numerous ways, including food/feed supply for living organisms, fuel production, and medicinal uses. Several plant extracts/products are used to treat variety of serious ailments in human and animals. *Lavandula angustifolia* is a flowering plant that possesses anti-inflammatory and anti-depressive medicinal properties. Cancer is a deadly disorder affecting millions of people globally. It affects several human organs, including liver, stomach, and lungs. Several researchers are doing efforts to eliminate the disease around the globe. In this study, Chang and Huh-7 liver cell lines were utilized as human normal hepatocyte model and innovation to mimic the liver environment. Cytotoxicity of *L. angustifolia* seed extracts was investigated at two different concentrations (50% and 100%) against Chang and Huh-7 liver cell lines by colorimetric assay which is used to assess cell metabolic activities. The Chang and Huh-7 liver cell lines were treated with *L. angustifolia* seeds extracts (50% and 100%) and incubated for 24 and 48 hours under standard conditions (37°C, 5% CO<sub>2</sub>). The 3-(4, 5-dimethylthiazol-2-yl)-2, 5-diphenyltetrazolium bromide assay was employed to quantify cell survival. Seed extracts of *L. angustifolia* exerted varied cytotoxic effects depending on the concentration and treatment duration. The results indicated that *L. angustifolia* seed extracts with 100% concentration exhibited the highest cytotoxicity against Huh-7 and Chang liver cell lines. In conclusion, *L. angustifolia* seed extracts exhibited cytotoxic activity which can be enhanced based on the concentration and treatment duration. The findings of the current study are critical for the development of novel herbal-based therapies for fatal disorders such as liver cancer. However, more investigations are required to reveal cytotoxicity mechanisms of *L. angustifolia* seed extracts.

## Introduction

Humanity has faced several health issues since its beginning. Several diseases pose significant threats to human life. Although medical science has witnessed significant progress in the twenty-first century, there are still several diseases that are incurable. Therefore, cures for these diseases must be investigated. Cancer is a fatal health issue that affects people all over the

world. It can arise in almost any tissue/organ of the body when anomalous cells grow uncontrollably, migrate to other organs through metastasizing process and cause death [1]. Cancer is the second leading cause of human mortality globally. World health organization reported 9.6 million (one in six deaths) deaths occurred during 2018 due to cancer [1]. Cancer in most common organs such as liver, stomach, colorectal, prostate, and lung is frequently observed in men, whereas thyroid, cervical, lung, colorectal, and breast cancer are widespread in women [2]. Among different kinds of cancers, incidents of liver cancer are dramatically increasing in males and remain stable in females in the age range of 30–59 years globally [3]. Liver cancer is widely initiated due to hepatitis B and C virus, and fatty liver in younger people. Furthermore, obesity leads to fatty liver disease, which is mounting in both developing and developed nations [4]. It has been suggested that constant rapid increase in liver cancer-mediated deaths is decreasing in women, whereas become stable in men. Therefore, liver cancer is more frequent in young and old populations, particularly in men [5]. However, the role of natural plant-based chemotherapy in liver cancer *in vivo* and *in vitro* systems remains poorly understood.

Different types of plants have been used in herbalism in various parts of the world in all civilizations at local level. The plant-based products are being suggested by professionals for the treatment of a variety of disorders. Numerous people around the world use herbal medications for a variety of medical needs. Plant species are thought to be a rich source of compounds that can be utilized for making active pharmaceutical or manufactured medications. Plant-based medicines are usually free of adverse effects, which makes them more popular among the public. Plant extracts serve various purposes, including natural coloring, crop pest management, food, cosmetics, and beverage etc. Natural plant species have been used not only as sources of food, but also as remedies for many diseases in the ancient era. Different reports suggested that there are unidentified properties in different parts of plants that can be used in the treatment of certain diseases [6]. The current investigation intended to reveal the potential anticancer and anti-proliferative activities of lavender plant extracts in liver cancer cell line in an *in vitro* model. The HuH-7 cell line was developed in 1982 from a 57-year-old Japanese male liver tumor patient's hepatocyte cell line. It was then further refined and now being used *in vitro* to produce hepatitis C virus (HCV) medicines. The unique characters of HuH-7 cell line reveal that it is made up of epithelial-like, tumorigenic cells that stick to the surface of flasks or plates and proliferate as 2D monolayers. According to detailed literature review, this is the first study investigating the impact of lavender seed extracts on liver cancer cells.

Lavender [*Lavandula angustifolia* Mill (LV) (Lamiales; Lamiaceae)] belongs to the mint family that is native to Mediterranean, Middle Eastern Asian countries, Arabian Peninsula, and Russia, also growing in Europe, United States, and Australia [7]. It has been used in numerous folk medicine traditions for aromatherapy, anxiety, depression, insomnia, headache, food processing, as an antiseptic, massage oil, tea, and source of drugs [8]. In the past decade, considerable scientific literature has reported that the extracts of *L. angustifolia* possess different pharmacological properties such as anti-neoplastic, antioxidant, anti-inflammatory, antifungal, antiviral, antiseptic, antibacterial, anti-depressive, anticancer, hepatoprotective, and immune-modulatory activities [9–16]. In addition, it is known to be used to cure wide spectrum of respiratory infections, central nervous system cardiovascular disorders, and chronic diseases such as cancer [17]. The *L. angustifolia* plant extracts are rich in hydrophilic constituents such as phenolic compound, anthocyanins, phytosterols, tannins, flavones, glycosides, and lipophilic components. Essential oil from the flowers of lavender constituents >300 biologically active chemical compounds, and their stature has been elucidated. Biological and pharmacological properties of essential oils imparted by terpenes and terpenoids [8].

However, clinical research of aromatherapy massage studies does not show a positive outcome in terminal cancer patients. On the other hand, there is enough literature confirmation on the therapeutic benefits of treating cancer patients. Furthermore, ability of *L. angustifolia* oil to alleviate various associated syndromes in cancer patients have been reported recently. Irrespective of the route of administration, higher concentration of lavender oil could be toxic [18]. Most of the studies have reported that distillation extracts of lavender had cytotoxic and apoptotic effects on various human cancer cells, including prostate cancer (PC-3), lung cancer (A-549), breast cancer (MCF7), and cervical cancer (HeLa). However, effects of *L. angustifolia* extract on liver cancer cells remain elusive [19]. Keeping in view the advantages of *L. angustifolia*, present study was conducted to evaluate the anticancer and anti-proliferative effects of lavender extracts from essential oils and their main components on human liver cancer cells. The efficacy of these constituents was evaluated and compared in both normal and cancer cell culture an *in vitro* model.

## Materials and methods

### Ethics statement

Seeds of *L. angustifolia* were collected from northern Saudi Arabia (Al- Khuzama desert, 30.9599° N, 41.0596° E). We declare that *L. angustifolia* seeds were not collected from public parks or protected areas. Moreover, it is not an endangered species in the country.

### Plant material

Lavender seeds were collected from northern desert of Saudi Arabia during spring season (April 2020). The collected seeds were dried at 50°C in an oven for 6 days. The dried seeds (with a moisture content of 8.25%) were cleaned, ground into powder (60-mesh sieve) and stored in plastic bags until use.

### Crude extract preparation

Crude extract was prepared following the method of Yagoub et al. [20]. A known weight of lavender seeds was separately soaked in 100% methanol and 50% methanol solution at a solid-to-liquid ratio of 1:10 in conical flasks. The flasks containing the mixtures were wrapped with aluminum foil, shaken for 6 h, and contents were filtered using Whatman No. 1 filter paper. The extraction solvents were removed from the filtrates by a vacuum heating at 40°C using rotary vacuum evaporator (HS-2005S, Hahnshin, S & T Co. Ltd., Korea), and lyophilized. The lyophilized samples were kept in containers and stored at -20°C until use.

### Chemicals and consumables

Cell culture plates and other plasticwares used in the current study were obtained from Tarsons Product Pvt. Ltd. Sigma-Aldrich, USA. The fetal bovine serum (FBS), trypsin-EDTA (0.25%), and Dulbecco's Modified Eagle Medium (DMEM) were obtained from Sigma-Aldrich in the United States. Neutral red dye, MTT, and other chemicals and solvents were of analytical grade and procured from Hi-Media, USA.

### Cell culture

Chang and Huh-7 liver cells were kindly provided by Dr. Saud Alarifi, Science College Lab, King Saud University, Saudi Arabia. Huh-7 and Chang liver cells were cultured in Dulbecco's Modified Eagle Medium (DMEM) medium supplemented with 10% fetal bovine serum (FBS),

1% antibiotic/antimycotic solution, and 0.2% NaHCO<sub>3</sub> in a CO<sub>2</sub> incubator at 37°C in a high humid atmosphere.

## Experimental blueprint

The Huh-7 and Chang liver cell lines were exposed to 20–2,400 µg/ml of 100% methanol and 50% methanol extract for 24 h. After extract exposure, cytotoxicity effect of lavender extracts was performed through morphological examination and MTT assay for Huh-7 and Chang liver cell lines.

## Cytotoxicity examination of lavender extracts through MTT assay

As explained in Mossman et al. [21], cytotoxic effect of lavender extract was measured through MTT method. Briefly, 10,000 Chang and Huh-7 liver cells were placed in 96 well culture plates and permitted to attach in CO<sub>2</sub> incubator overnight. Afterwards, Chang and Huh-7 liver cell lines were treated with 20–2,400 µg/ml 100% methanol and 50% methanol extracts of lavender for 24 h. After exposure, 5 mg/ml MTT solution (10 µl/well) was added, and incubation continued for additional 4 h. After MTT exposure, culture medium without cells was detached from the wells, and 200 µl of DMSO was supplemented to every well and mixed thoroughly. The absorbance of plates was recorded at 550 nm [21, 22].

## Statistical analysis

Statistical analysis was executed on SPSS Statistics for Windows, version 21.0 (SPSS Inc., Chicago, IL, USA). The data are mentioned as means ± SE from four independent experiments with three replications each time. The p values (< 0.05) were used for statistically significance between different experimental groups using one-way ANOVA.

## Results

Stereological investigation of Huh-7 liver cells' viability exposed with *L. angustifolia* [50% (LV50%) and 100% (LV100%)] methanol extracts at concentrations from 20 to 2400 µg/ml 24 hours after incubation are shown in Fig 1A and 1B. Cell viability was not decreased by LV50% <200 µg/ml, whereas significantly decreased by LV50% concentration >200 µg/ml. However, LV100% extracts could not cause cytotoxicity until 2200 µg/ml concentration, whereas it significantly decreased by LV100% concentration at 2400 µg/ml.

Fig 2A and 2B show cell viability of Chang liver cells exposed to different concentrations of *L. angustifolia* methanol extracts. Cell viability was not affected by LV50%, and LV100% methanol extracts-treated Chang liver cells at concentrations <200 µg/ml, whereas significantly decreased by the concentrations >200 µg/ml after 24 h incubation compared with control cells.

Fig 3A and 3B show cell viability of Huh-7 liver cells exposed to LV50% and LV100% at concentrations from 20 to 2400 µg/ml 48 hour after incubation. Cell viability was significantly decreased by LV50% and LV100% methanol extracts at all concentrations 48 h after incubation. The LV100% methanol extracts greatly increased cytotoxicity at >100 µg/ml concentrations compared to LV50% 48 hour after incubation.

Fig 4A and 4B shows cell viability of Chang liver cells exposed treated with LV50% and LV100% extracts at concentrations ranging from 20 to 2400 µg/ml 48 hours after incubation. Cell viability was significantly decreased by LV50% and LV100% methanol extracts at all concentrations 48 hours after incubation. The LV 100% methanol extracts significantly increased cytotoxicity >100 µg/ml concentrations compared to LV50% 48 hours after incubation.

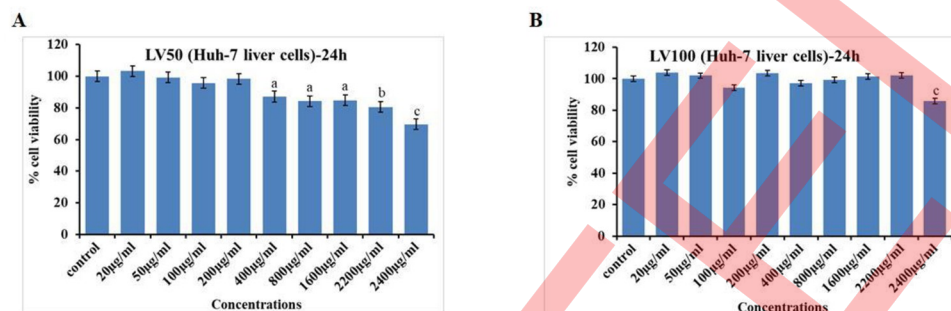

**Fig 1.** Cell viability in Huh-7 liver cells treated with methanol extracts of *Lavandula angustifolia* 50% (1A) and 100% concentration (1B) at 24 h after incubation. The data are presented as means  $\pm$  SE of four different experiments. The means which do not share a common letters differ significantly from control.

<https://doi.org/10.1371/journal.pone.0267499.g001>

## Discussion

Researchers around the world are looking at the use of plant-derived medicines as a healthcare supplement [23]. Herbal medicines remain to be standard methods in cancer chemotherapy management. This is due to lacuna of the scientific evidence. However, plant-based compounds represent a massive percentage of pharmaceutical manufacture in the modern world [24]. Identification of biologically targetable compounds that take advantage of divergence between normal and cancerous cells could permit superior specificity for cancer treatment with minimal disadvantage to healthy cells is still the eventual objective in antitumor drug development [25].

Hepatocellular carcinoma (HCC), a type of malignant tumors, is causing high mortality of cancer-related death worldwide. Compared to other forms of cancers, HCC arises from several stages and multifactorial progression. Different risk factors drive the progression of HCC malignancy, and treatments are not effective once the disease is initiated [26, 27]. The currently used most important anticancer drugs, including vincristine, vinblastine, and paclitaxel were developed through the investigation of different indigenous preparations [28]. The present study underscores the therapeutic efficacy of *L. angustifolia* seed extract by indicating its cytotoxic property against Hun7 cells, human hepatocellular carcinoma cells, and Chang liver cells, explaining the cell death mechanism *in vitro*.

We found that *L. angustifolia* seed extract has cytotoxic-inducing effects in Huh7 and Chang liver cells in a duration and concentration-dependent mode. The cytotoxic property could be due presence of different pharmacological active principles in LV50% and LV100%

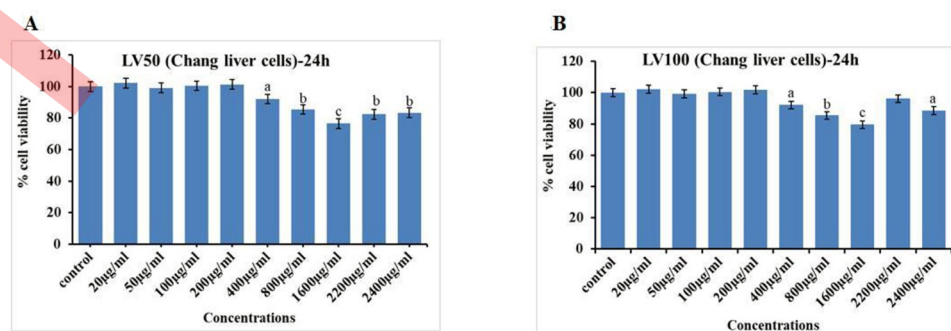

**Fig 2.** Cell viability in Chang liver cells treated with methanol extracts of *Lavandula angustifolia* 50% (2A) and 100% concentration (2B) at 24 h after incubation. The data are presented as means  $\pm$  SE of four different experiments. The means which do not share a common letters differ significantly from control.

<https://doi.org/10.1371/journal.pone.0267499.g002>



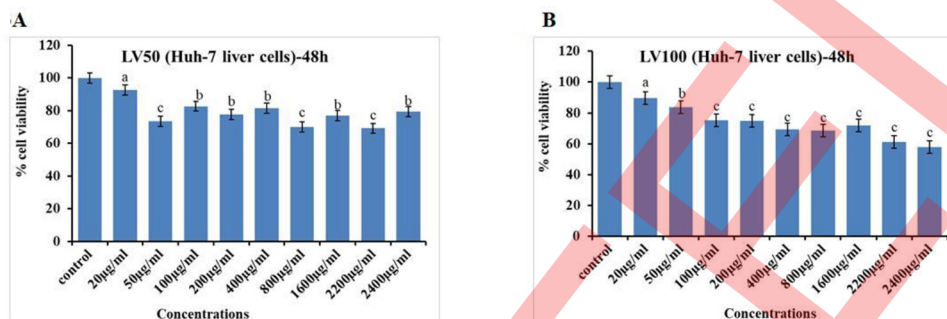

**Fig 3.** Cell viability in Huh-7 liver cells treated with methanol extracts of *Lavandula angustifolia* 50% (3A) and 100% concentration (3B) at 48 h after incubation. The data are presented as means  $\pm$  SE of four different experiments. The means which do not share a common letters differ significantly from control.

<https://doi.org/10.1371/journal.pone.0267499.g003>

seed extract. Based on the result, we found that 100% methanol extract of *L. angustifolia* seed extract increased cytotoxicity at 48 h compared to other time. A similar pattern of results we observed that *Tridham* and its active principles showed cytotoxic property in the human cancer cell lines [29]. Our findings are in line with a prior study that reported a moderate antiproliferative effect of the essential oil of *L. angustifolia* grown in Brazil against GM07492 human fibroblasts cells [30]. In addition, our MTT results are comparable to the study performed by Najaran and Amiri [31], who found that various extracts and essential oils of *L. angustifolia* exhibited a promising cytotoxicity against HeLa and MCF-7 cancer cell lines. Another recent work investigated the antiproliferative activity of *L. angustifolia* essential oils that grown in Tuscany (Italy) showed a notable effect against SHSY5Y neuroblastoma cell line [32], and these variations in results could be attributed to the cell lines used. The outcome of the current investigation discloses that *L. angustifolia* seed extract induces active growth inhibition in hepatoma cells. Presence of several phytochemicals such as carvacrol, spathulenol, p-cymene-8-ol, caryophyllene oxide, and terpinolene present in *L. angustifolia* seed extract are responsible for the obtained results. Salleem et al. [33] reported the initiation one of cascade events of cell death known as apoptosis in cancer cell lines.

## Conclusions

In conclusion, *L. angustifolia* seed extract may provide the possibility of cancer prevention and therapy, which is evidenced by the inhibition of cytotoxicity in cancer cell lines. Among the

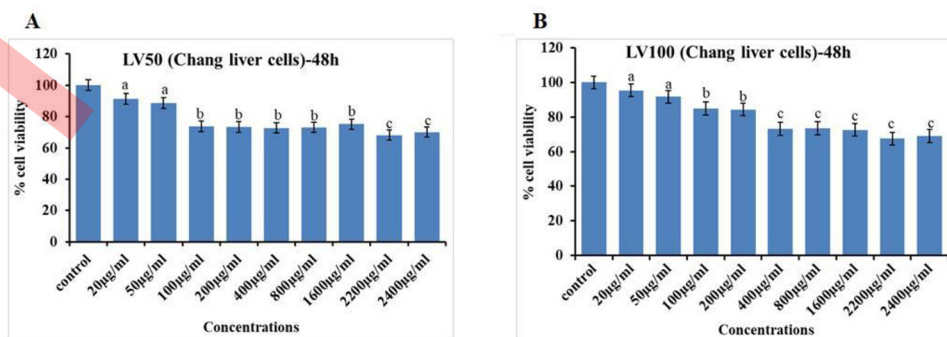

**Fig 4.** Cell viability in Chang liver cells treated with methanol extracts of *Lavandula angustifolia* 50% (4A) and 100% concentration (4B) at 48 h after incubation. The data are presented as means  $\pm$  SE of four different experiments. The means which do not share a common letters differ significantly from control.

<https://doi.org/10.1371/journal.pone.0267499.g004>

two tested doses, 100% methanol extract exhibited promising cytotoxic properties. Further, additional investigations are warranted to delineate proper molecular mechanisms involved in the anticancer activity.

## Author Contributions

**Conceptualization:** Ghedeir M. Alshammari.

**Data curation:** Ghedeir M. Alshammari.

**Formal analysis:** Ghedeir M. Alshammari.

**Funding acquisition:** Ghedeir M. Alshammari.

**Investigation:** Ghedeir M. Alshammari.

**Methodology:** Ghedeir M. Alshammari.

**Project administration:** Ghedeir M. Alshammari.

**Resources:** Ghedeir M. Alshammari.

**Software:** Ghedeir M. Alshammari.

**Validation:** Ghedeir M. Alshammari.

**Visualization:** Ghedeir M. Alshammari.

**Writing – original draft:** Ghedeir M. Alshammari.

**Writing – review & editing:** Ghedeir M. Alshammari.

## References

1. World Health Organization (WHO) report on Breast Cancer. Retrieved October 22, 2018, from (2018) <http://www.who.int/cancer/prevention/diagnosis-screening/breast-cancer/en/>.
2. World Health Organization (WHO) report on cancer: setting priorities, investing wisely and providing care for all. Geneva: World Health Organization; 2020. <http://apps.who.int/iris>.
3. Singh S, Fujii LL, Murad MH, Wang Z, Asrani SK, Ehman RL, et al. Liver stiffness is associated with risk of decompensation, liver cancer, and death in patients with chronic liver diseases: a systematic review and meta-analysis. Clin Gastroenterol Hepatol 2013; 11(12): 1573–1584. <https://doi.org/10.1016/j.cgh.2013.07.034> PMID: 23954643
4. Siegel RL, Miller KD, Goding Sauer A, Fedewa SA, Butterly LF, Anderson JC, et al. Colorectal cancer statistics, 2020. CA: a cancer journal for clinicians. 2020; 70(3): 145–64.
5. Liu Z, Suo C, Mao X, Jiang Y, Jin L, Zhang T, et al. Global incidence trends in primary liver cancer by age at diagnosis, sex, region, and etiology, 1990–2017. Cancer 2020; 126(10): 2267–78. <https://doi.org/10.1002/cncr.32789> PMID: 32201944
6. Al-Sheddi ES. Cytotoxic potential of Petroleum ether, ethyl acetate, chloroform, and ethanol extracts of *Lavandula Coronopifolia* against human breast carcinoma cell line (MDA-MB-321). Asian Pac J Cancer Prev 2019; 20(10): 2943–2949. <https://doi.org/10.31557/APJCP.2019.20.10.2943> PMID: 31653139
7. Zamanian-Azodi M, Rezaie-Tavirani M, Heydari-Kashal S, Kalantari S, Dailian S, Zali H. Proteomics analysis of MKN45 cell line before and after treatment with lavender aqueous extract. Gastroenterol Hepatol Bed Bench 2012; 5(1): 35–42. PMID: 24834196
8. Gezici S. Promising anticancer activity of lavender (*Lavandula angustifolia* Mill.) essential oil through induction of both apoptosis and necrosis. Annals of Phytomedicine. 2018; 7(2):38–45.
9. Cavanagh HT, Wilkinson JT. Biological activities of lavender essential oil. Phytother Res 2002; 16(4):301–308. <https://doi.org/10.1002/ptr.1103> PMID: 12112282
10. Atsumi T, Tonosaki K. Smelling lavender and rosemary increases free radical scavenging activity and decreases cortisol level in saliva. Psychiatry Res 2007; 150(1): 89–96. <https://doi.org/10.1016/j.psychres.2005.12.012> PMID: 17291597

11. Yang SA, Jeon SK, Lee EJ, Shim CH, Lee IS. Comparative study of the chemical composition and antioxidant activity of six essential oils and their components. *Nat. Prod Res* 2010; 24(2): 140–151. <https://doi.org/10.1080/14786410802496598> PMID: 20077307
12. Adaszyńska M, Swarczewicz M, Dziecioł M, Dobrowolska A. Comparison of chemical composition and antibacterial activity of lavender varieties from Poland. *Nat Prod Res* 2013; 27(16): 1497–501. <https://doi.org/10.1080/14786419.2012.724408> PMID: 22989360
13. Nikolić M, Jovanović KK, Marković T, Marković D, Gligorijević N, Radulović S, et al. Chemical composition, antimicrobial, and cytotoxic properties of five Lamiaceae essential oils. *Ind Crops Prod* 2014; 61: 225–232.
14. Carrasco A, Tomas V, Tudela J, Miguel MG. Comparative study of GC-MS characterization, antioxidant activity and hyaluronidase inhibition of different species of *Lavandula* and *Thymus* essential oils. *Flavour Fragr J* 2016; 31(1): 57–69.
15. Shokri A, Saeedi M, Fakhari M, Morteza-Semnani K, Keighobadi M, Teshnizi SH, et al. Antileishmanial activity of *Lavandula angustifolia* and *Rosmarinus officinalis* essential oils and nano-emulsions on *Leishmania major* (MRHO/IR/75/ER). *Iran J Parasitol* 2017; 12(4): 622. PMID: 29317888
16. Gouda B, Mousa O, Salama M, El-Eraky W, Kassem H. Total phenolic, total flavonoid content, two isolates and bioactivity of *Lavandula pubescens* Decne. *Int J Pharmacogn Phytochem Res* 2018; 10(06): 254–263.
17. Selmi S, Jallouli M, Gharbi N, Marzouki L. Hepatoprotective and renoprotective effects of lavender (*Lavandula stoechas* L.) essential oils against malathion-induced oxidative stress in young male mice. *J Med Food* 2015; 18(10): 1103–1111. <https://doi.org/10.1089/jmf.2014.0130> PMID: 25835641
18. National center for complementary and integrative Health (NCCIH) Lavender. Natural Medicines Web site. Accessed at [naturalmedicines.therapeuticresearch.com/](http://naturalmedicines.therapeuticresearch.com/) on April 8, 2016. <https://www.nccih.nih.gov/health/lavender>.
19. Zhao Y, Chen R, Wang Y, Qing C, Wang W, Yang Y. In vitro and in vivo efficacy studies of *Lavender angustifolia* essential oil and its active constituents on the proliferation of human prostate cancer. *Integr Cancer Ther* 2017; 16(2): 215–226. <https://doi.org/10.1177/1534735416645408> PMID: 27151584
20. Yagoub Abu ElGasim Ahmed, Alshammari Ghedeir Muslem, Subash-Babu Pandurangan, Mohammed Mohammed Awad alkareem, Yahya Mohammed Abdo and Alhosai Aesha Ibrahim. Synthesis of *Ziziphus spinachristi* (Jujube) root methanol extract loaded functionalized silver nanoparticle (ZS-Ag-NPs); Physiochemical characterization and effect of ZS-Ag-NPs on adipocyte maturation, adipokine and vascular smooth muscle cell interaction. *Nanomaterials* 2021, 11(10); 2563. <https://doi.org/10.3390/nano11102563> PMID: 34685001
21. Mossman B, Light W, Wei E. Asbestos: mechanisms of toxicity and carcinogenicity in the respiratory tract. *Annu Rev Pharmacol Toxicol* 1983; 23(1): 595–615. <https://doi.org/10.1146/annurev.pa.23.040183.003115> PMID: 6347054
22. Almukhlafi H, Ali D, Almutairi B, Yaseen KN, Alyami N, Almeer R, et al. Role of Oxidative Stress in La2O3 Nanoparticle-Induced Cytotoxicity and Apoptosis in CHANG and HuH-7 Cells. *Int J Nanomedicine*. 2021 (16);3487–3496. <https://doi.org/10.2147/IJN.S302478> PMID: 34295157
23. Newall CA, Anderson LA, Phillipson JD. Herbal medicines. A guide for health-care professionals. The pharmaceutical press; London, UK, 1996.
24. Schulz V., Rudolf H. and Tyler V.E. (1998). Rational Phytotherapy. A Physician's Guide to Herbal Medicine, 3rd ed.; Springer: Berlin, Germany, 1998.
25. Adams J. Proteasome inhibition in cancer: development of PS-341. In *Seminars in oncology* 2001 Dec 1 (Vol. 28, No. 6, pp. 613–619). WB Saunders.
26. Lee JS, Chu IS, Heo J, Calvisi DF, Sun Z, Roskams T, et al. Classification and prediction of survival in hepatocellular carcinoma by gene expression profiling. *Hepatology* 2004; 40(3): 667–676. <https://doi.org/10.1002/hep.20375> PMID: 15349906
27. Thomas MB, Zhu AX. Hepatocellular carcinoma: the need for progress. *J Clin Oncol* 2005; 23(13): 2892–2899. <https://doi.org/10.1200/JCO.2005.03.196> PMID: 15860847
28. Patwardhan B. Ethnopharmacology and drug discovery. *J Ethnopharmacol* 2005; 100(1–2): 50–52. <https://doi.org/10.1016/j.jep.2005.06.006> PMID: 16023811
29. Jaganathan R, Ravinayagam V, Panchanadham S, Palanivelu S. Potential therapeutic role of Tridham in human hepatocellular carcinoma cell line through induction of p53 independent apoptosis. *BMC Compl Alternative Med* 2013; 13(1): 1–4. <https://doi.org/10.1186/1472-6882-13-323> PMID: 24256980
30. Mantovani A, Vieira G, Cunha W, Groppo M, Santos R, et al. Chemical composition, antischistosomal and cytotoxic effects of the essential oil of *Lavandula angustifolia* grown in Southeastern Brazil. *Rev Bras Farmacogn* 23(2013): 877–884.



31. Najaran Z and Amiri A. Comparative Studies of Cytotoxic and Apoptotic Properties of Different Extracts and the Essential Oil of *Lavandula angustifolia* on Malignant and Normal Cells. *Nutrition and Cancer*, 66(3); 424–434. <https://doi.org/10.1080/01635581.2013.878736> PMID: [24571090](https://pubmed.ncbi.nlm.nih.gov/24571090/)
32. Garzoli S, Masci V, Franceschi S, Tiezzi A, Giacomello P and Ovidi E. Headspace/GC–MS Analysis and Investigation of Antibacterial, Antioxidant and Cytotoxic Activity of Essential Oils and Hydrolates from *Rosmarinus officinalis* L. and *Lavandula angustifolia* Miller. *Foods* 2021, 10, 1768. <https://doi.org/10.3390/foods10081768> PMID: [34441545](https://pubmed.ncbi.nlm.nih.gov/34441545/)
33. Sellam K, Ramchoun M, Alem C, Khallouki F, El Moulaj B, El Rhaffari L. Chemical composition, antioxidant and antimicrobial activities of essential oil of *Warionia saharae* from oases of Morocco. *Gas Chromatography–Biochemicals, Narcotics and Essential Oils*. 2012: 213–220.
